# Supplementary material for: Hub gene identification and molecular subtype construction for Helicobacter pylori in gastric cancer via machine learning methods and NMF algorithm
Source: Aging (Albany NY). 2023 Sep 26;15(21):11782–810. doi: 10.18632/aging.205053 (PMC10683617; doi:10.18632/aging.205053)
Supplement: Supplementary Table 2 [file aging-15-205053-s003.xlsx]

## Sheet: Sheet1
Supplementary Table 2. The list of HP-related gene sets.
Genes down-regulated in AGS cells (gastric adenocarcinoma): control versus H. pylori LPS.	Genes up-regulated in AGS cells (gastric adenocarcinoma): control versus H. pylori LPS.	Genes down-regulated in MKN45 cells (stomach cancer): control versus H. pylori LPS.	Genes up-regulated in MKN45 cells (stomach cancer): control versus H. pylori LPS.	Helicobacter pylori infection	Epithelial cell signaling in Helicobacter pylori infection
AFF4	ACAP1	ABHD2	ACO1	CARMIL2	ADAM10
ARHGAP9	ACIN1	ACBD6	ACYP2	CORIN	ADAM17
ARID4B	ADAMTS10	ACO1	AGAP1	FLT1	ATP6AP1
ASH1L	AGTPBP1	ACP3	AKT2	IFNGR1	ATP6V0A1
ATXN7	AIFM1	ALCAM	ALYREF	STOX1	ATP6V0A2
BCLAF1	ANKRD16	AMMECR1	ANK3		ATP6V0A4
BDP1	ANLN	ANK3	APLP1		ATP6V0B
BOD1L1	ARHGAP19	ANKRD33	ARL2BP		ATP6V0C
CASD1	ARHGAP30	AQP2	ATP6V1D		ATP6V0D1
CCL3	ARHGAP45	AR	AVEN		ATP6V0D2
CCNL1	ATAD2	ARHGEF15	BARHL1		ATP6V0E1
CCNL2	ATAD5	ASNS	BIN3		ATP6V0E2
CCNT1	BAIAP3	ATOX1	BMPR2		ATP6V1A
CCNT2	BAZ1A	ATP1B1	CAPNS1		ATP6V1B1
CD69	BCLAF1	ATXN10	CAPZB		ATP6V1B2
CDK11B	BMPR1A	B4GALNT1	CCDC85C		ATP6V1C1
CDR2	BRCA1	BCAP29	CCT4		ATP6V1C2
CEBPZ	BTK	BRSK2	CEP350		ATP6V1D
CEP95	CASP4	BTF3	CHCHD3		ATP6V1E1
CLCN7	CD99L2	C2CD4C	CHD9		ATP6V1E2
CLK4	CDC16	CAMK2D	CHIC2		ATP6V1F
CMAHP	CDK16	CAMK4	CHMP2B		ATP6V1G1
CNTRL	CDKN2C	CAND2	CLDN3		ATP6V1G2
COG3	CENPH	CAPZB	COX4I1		ATP6V1G3
CSNK1A1	CENPI	CARD9	CSTF3		ATP6V1H
CTLA4	CENPL	CD4	DCPS		CASP3
CTSE	CEP95	CLTA	DDX10		CCL5
CXCR5	CHTF18	COL5A3	DENND1B		CDC42
DDX17	CIT	COQ3	DENND4C		CHUK
DDX3X	CKAP2L	CORO2B	DGUOK		CSK
DDX5	CKAP5	CORT	DIP2C		CXCL1
DENND1C	CLCN7	COX4I1	DIS3L		CXCL8
DHX36	CMPK2	CPT1C	DPY30		CXCR1
DICER1	CNIH4	CRB3	DRAM1		CXCR2
DOCK10	CPSF1	CRIM1	DSTN		EGFR
DOCK9	CXCL13	DCUN1D5	EFNA3		F11R
DUSP6	CYP17A1	DENND2B	EFNB3		GIT1
EEA1	CYP20A1	DISP1	ELOC		HBEGF
EML4	DDX46	DMRTB1	ENTPD3		IGSF5
ENTPD1	DEPDC1	DNAJB13	ERH		IKBKB
ENTPD4	DGCR8	EIF3H	ERI1		IKBKG
EPS8L1	DHX30	ESPN	EXT2		JAM2
ERBIN	DNA2	ETFA	FAM126A		JAM3
EXOC1	DNM1L	F2RL1	FAM181A		JUN
EXOSC2	DYNC1LI2	FAM181A	FBXO27		LYN
FAM120A	DYNLL2	FAM3C	FGF11		MAP2K4
FBXL20	DZIP1	FAM3D	FIS1		MAP3K14
FOSB	E2F8	FBXL17	FNDC5		MAPK10
FRG1	ELMOD2	FGF1	FOXQ1		MAPK11
GBP4	EME1	FOXH1	FRYL		MAPK12
GBP5	ENTPD1	FRMD8	GCNT3		MAPK13
GBP6	ENTR1	FUNDC2	GGH		MAPK14
GEMIN5	ESCO2	GAS2L1	GLUL		MAPK8
GNL2	ESPL1	GDF6	GNG3		MAPK9
GPR132	FAM193B	GGH	GRAMD2A		MET
GRAP2	FAM76B	GNG10	HAND2		NFKB1
HNRNPH1	FBXO48	GNG3	HES2		NFKBIA
HNRNPR	FYCO1	GP9	HEXA		NOD1
IDE	G2E3	GPR25	HMBS		PAK1
ING4	G3BP1	GPR52	HMX3		PLCG1
ITGB2	GALNT7	GTDC1	HNRNPUL1		PLCG2
ITSN2	GANAB	GUCY2EP	HSCB		PTPN11
IVNS1ABP	GBP5	HAP1	IGF2BP3		PTPRZ1
JAK1	GDI1	HMGA2	IP6K3		RAC1
JCHAIN	GMEB2	HRK	IRX1		RELA
KCNN4	GNPTAB	HS1BP3	ITGA1		SRC
KTN1	GPSM2	IER3	KCNH4		TCIRG1
L3MBTL3	GRAMD1A	INSYN2B	KIF12		TJP1
LAX1	GRK5	IRF6	KLHDC10
LGALS8	GTF3C4	IRX1	KLHL24
LILRB4	GZF1	ITGA2B	LEF1
MALT1	H1-1	ITGA6	LLPH
MAPK8IP3	HELLS	ITGA7	LSR
MARCHF7	HNRNPH1	KLHL24	LY6G5C
MBNL1	HNRNPU	LCLAT1	LYPLA1
MED8	IFITM2	LEF1	LYSMD2
MOB3A	IKBKE	LMBRD1	MCTP2
MPHOSPH10	IL12RB2	LRBA	MEA1
MRPS21	ING1	LRRC4B	METTL9
MTA3	IRAG2	LTBP3	MIR17HG
MX1	IVNS1ABP	LYSMD2	MIR491
MYB	KIF15	MBIP	MIR503
MYC	KIF4A	MEGF6	MIR665
MYCBP2	MAGI3	MGMT	MPHOSPH6
NAMPT	MAN1B1	MIPEP	MRPL40
NCLN	MAP3K7	MIR129-1	MRPL48
NEMP2	MAPK8IP3	MIR17HG	MRPS35
NFKB2	MCM4	MIR375	MTCH2
NIPBL	MDM2	MIRLET7B	MTMR9
NKTR	MIS18BP1	MLPH	NEBL
NLRC5	MLEC	MSH3	NRGN
NR4A1	MLH1	MTX2	NRP1
OGT	MPHOSPH9	MYL9	NUDT19
PDE2A	MTMR4	NBAS	NXPE1
PDE4D	MTO1	NECTIN4	ODAD3
PDK1	NAA35	NIT2	PA2G4
PHF21A	NCAPD2	NOL7	PANX2
PIK3C2A	NCAPD3	NPAS1	PCIF1
PIN4	NCAPH	NRGN	PDCD1
PKNOX1	NCLN	NRP1	PDCL3
PLCB2	NDC1	NTN4	PDLIM1
PNISR	NELFCD	NXPE1	POLR1D
PPCDC	NOP58	P2RX2	POU5F2
PPIL4	PANK3	PDCD1	PPBP
PPP3R1	PAPOLA	PDGFB	PPP1R3E
PPP4R3A	PCGF6	PDLIM1	PRDX1
PRMT7	PDE4D	PDLIM2	PRKX
PRPF38B	PHF11	PHGR1	PROX2
PRPF4B	PIF1	PITX1	PRPF38A
PRRC2C	PIH1D1	PLBD2	PRPH2
RANBP6	PIK3C2A	PPL	PSMA2
RASA1	PLK1	PPT2	PSMD1
RBM39	PLOD2	PRKCB	PSMD13
RELB	PLXNC1	PROP1	RAB21
RGS1	POLA2	PRR23A	RLN3
RPS6KB1	PPM1J	PSMG4	RMRP
RUNDC3B	PPOX	PTP4A2	RNPS1
SAMD3	PREB	RAB21	RNY3
SEMA7A	PRKAR2B	RAB8A	RP9
SENP5	PRPF3	RASGRF2	RPF1
SESN3	PTPN12	RBM3	RPH3AL
SETBP1	PTPN7	RBX1	RPL23A
SFT2D1	PTPN9	RGS3	RPL35A
SHOC2	RACGAP1	RMRP	RPSA
SIRT7	RAD51	RN7SK	RWDD4
SLC16A5	RAF1	RNF138	SACS
SLC1A5	RASGRP1	RPH3AL	SARS1
SLC20A1	RASGRP2	RPL23A	SCN2B
SNAPC4	RASGRP3	RPL24	SCNN1A
SRSF10	RBM15	RTN4R	SCRT1
SRSF2	REXO4	RTN4RL1	SDHD
SRSF6	RFK	S100A6	SLITRK1
SRSF7	RNF170	S1PR2	SNORA52
STAT1	RNF4	SARS1	SNORD49B
STK39	RPRD1A	SEMA6C	SNRPB2
STX4	RRM2	SH2D4B	SNRPC
TAF4	RTEL1	SHROOM3	SP2
TBC1D2B	RTF1	SLC24A3	SPEM1
TENT5C	SAMD3	SLC25A16	SSBP3
THAP12	SBF1	SNORA30	STT3B
TIA1	SC5D	SPATA6	SUGT1
TMEM254-AS1	SEC24C	SSR1	SYT6
TMEM62	SEMA4A	SSTR2	SYT7
TMEM87B	SGO1	TANC2	TASP1
TNRC6A	SGO2	TANGO6	TBCA
TOMM70	SLC4A2	TENT5A	THYN1
TPR	SMPDL3B	TM2D1	TMEM158
TRAF1	SNRNP70	TMED7	TMEM176B
TRAPPC14	SOAT2	TMEM134	TRMT12
TRIM68	SRSF6	TMEM171	TRMT5
TTC14	SRSF7	TMEM60	TSEN34
TUG1	SSR3	TNFRSF12A	TSPAN6
USP33	SUPT20H	TNNI2	TTBK1
VPS36	SUV39H1	TRPS1	TUBB1
VWA5A	TAF1	TSC22D2	TXNDC9
XAF1	TAF1D	TSHZ3	UBE2K
XRN2	TEP1	TTC7B	UBE2V1
ZBTB41	TGDS	USP28	UNC119
ZC3H14	THAP3	VAMP4	VANGL2
ZC3H7A	THY1	VAPA	VAPA
ZC3HAV1	TMPRSS13	VEGFA	VDAC3
ZFAND2A	TNPO2	VSTM2L	VKORC1L1
ZFC3H1	TOE1	WDTC1	VWA2
ZKSCAN3	TPR	WNT5B	WFIKKN2
ZNRF1	TRAP1	ZBTB33	ZBED3
ZRSR2	TRPV2	ZGLP1	ZBTB42
	TUBGCP4	ZMPSTE24	ZFP64
	TXLNA		ZNRF2
	UHRF1		ZYG11B
	USP15		ZYX
	USP37
	USP5
	UTP20
	WDHD1
	WDR62
	WDR82
	ZBTB41
	ZCRB1
	ZMYM5
	ZMYND11
