# Supplementary material for: Hub gene identification and molecular subtype construction for Helicobacter pylori in gastric cancer via machine learning methods and NMF algorithm
Source: Aging (Albany NY). 2023 Sep 26;15(21):11782–810. doi: 10.18632/aging.205053 (PMC10683617; doi:10.18632/aging.205053)
Supplement: Supplementary Table 3 [file aging-15-205053-s004.xlsx]

## Sheet: Sheet1
Supplementary Table 3. 232 differentially expressed HP-related genes.
gene	conMean	treatMean	logFC	pValue	fdr
CCNL2	14.0985	31.3113	1.15114	2.08e-10	1.29e-09
THY1	14.8357	62.9614	2.08539	4e-13	4.89e-12
SGO2	1.42355	6.9888	2.29555	3.15e-17	2.24e-15
MIR17HG	0.281412	1.46771	2.38281	1.73e-13	2.34e-12
GBP5	2.11719	15.41	2.86364	5.58e-10	3.13e-09
VEGFA	12.5396	38.5755	1.62119	4.91e-12	4.51e-11
NCAPD2	19.4985	63.3797	1.70066	6.61e-16	2.1e-14
PSMD1	42.3951	91.5144	1.1101	3.61e-16	1.32e-14
F11R	22.9016	57.5785	1.33008	1.82e-12	1.85e-11
NRP1	9.94292	21.3431	1.10202	3.72e-08	1.42e-07
IGF2BP3	0.359491	5.38554	3.90506	5.99e-13	7e-12
TNFRSF12A	35.0378	104.758	1.58008	6.41e-11	4.46e-10
REXO4	12.6151	27.0885	1.10253	3.22e-14	5.3e-13
MIPEP	8.38166	20.1131	1.26282	9.81e-14	1.42e-12
FOXH1	0.0978267	1.98672	4.34402	4.91e-14	7.68e-13
RP9	8.51824	19.6446	1.2055	2.58e-17	2e-15
LLPH	4.50288	10.0738	1.16169	1.21e-16	5.76e-15
ATP6V1G2	2.35619	0.796969	-1.56386	0.0158083	0.020802
TUG1	32.5012	67.8345	1.06153	6.61e-12	5.9e-11
LEF1	2.93346	10.7643	1.87557	2.61e-12	2.57e-11
PLXNC1	3.38604	9.06692	1.42102	1.32e-07	4.49e-07
CKAP5	18.0422	52.6706	1.54562	1.15e-15	3.26e-14
NCAPD3	4.58512	16.3534	1.83456	1.93e-16	8.09e-15
ADAM10	8.91463	24.9659	1.48571	2.32e-16	9.34e-15
PTPN12	22.5145	51.6476	1.19784	1.29e-11	1.06e-10
NCLN	42.122	91.4227	1.11798	8.79e-12	7.61e-11
P2RX2	2.91559	0.595117	-2.29254	5.4e-13	6.4e-12
IFNGR1	57.0038	122.35	1.10188	1.82e-11	1.44e-10
RASGRP3	2.07992	4.33349	1.059	2.44e-08	9.68e-08
EFNA3	6.93465	18.341	1.40318	2.42e-10	1.48e-09
ERI1	3.71813	11.7152	1.65573	1.61e-17	1.54e-15
SNRPC	72.7146	148.999	1.03498	3.23e-15	7.63e-14
DNA2	1.1622	7.19519	2.63017	5.88e-18	8.87e-16
XAF1	2.92802	8.85485	1.59654	1.83e-09	9.2e-09
CENPI	0.865393	4.88026	2.49553	3.69e-18	7.16e-16
MYL9	2793.23	561.262	-2.31519	6.11e-05	0.000122838
ITGA6	46.4448	139.264	1.58423	5.08e-12	4.65e-11
CPT1C	1.17931	2.60447	1.14305	0.00070236	0.00117103
JCHAIN	5605.23	677.959	-3.0475	0.00214574	0.00327832
VKORC1L1	16.7313	35.4	1.0812	1.42e-14	2.65e-13
NCAPH	3.65072	19.6052	2.42499	2.64e-16	1.04e-14
LYN	17.0847	46.6635	1.44959	2.98e-12	2.88e-11
TMEM176B	107.304	254.365	1.2452	1.64e-07	5.49e-07
PRRC2C	29.9823	74.2761	1.30879	1.3e-16	6.07e-15
TASP1	5.21369	11.9413	1.19559	4.57e-14	7.2e-13
MYB	2.76064	16.361	2.56719	2.09e-12	2.1e-11
USP37	2.20085	4.46893	1.02186	1.18e-08	5e-08
THAP12	8.39759	18.9921	1.17735	5.6e-14	8.63e-13
AQP2	0.0778158	5.07083	6.02601	4.68e-07	1.42e-06
TAF4	5.0977	13.9263	1.44989	1.13e-16	5.5e-15
CIT	2.23309	7.83525	1.81094	8.87e-16	2.66e-14
DNAJB13	0.0597084	0.23205	1.95843	4.75e-06	1.18e-05
DRAM1	9.51624	25.5778	1.42643	1.74e-11	1.39e-10
CLDN3	101.655	356.775	1.81134	2.72e-08	1.07e-07
SH2D4B	0.0229301	0.117071	2.35206	1.18e-09	6.23e-09
SCRT1	0.0369226	0.336291	3.18713	0.000576662	0.000975858
PRPF3	9.19235	19.6904	1.09899	3.06e-13	3.88e-12
COL5A3	4.58625	13.852	1.59471	2.15e-09	1.07e-08
TRPV2	6.38093	13.3226	1.06204	1.37e-06	3.8e-06
GNL2	10.4019	24.551	1.23894	3.79e-18	7.23e-16
RRM2	12.232	54.101	2.145	2.88e-15	6.95e-14
SLC20A1	9.6646	29.2608	1.59819	1.37e-16	6.35e-15
DCUN1D5	15.1596	33.0798	1.12571	5.54e-14	8.55e-13
EML4	14.659	45.571	1.63633	9.61e-18	1.11e-15
CMPK2	8.09057	16.227	1.00409	0.000144463	0.000271388
FAM120A	73.2118	154.745	1.07975	2.62e-14	4.45e-13
CENPH	3.26841	11.1367	1.76866	1.51e-16	6.75e-15
IL12RB2	0.383833	0.86204	1.16728	0.000101044	0.000194916
LYPLA1	32.7805	68.1331	1.05552	3.52e-11	2.6e-10
L3MBTL3	2.69835	5.47081	1.01968	1.58e-08	6.52e-08
BRCA1	2.38935	9.99214	2.06417	4.77e-17	2.94e-15
DDX10	3.95789	10.2085	1.36696	3.15e-17	2.24e-15
GIT1	22.5139	50.1501	1.15544	9.57e-13	1.06e-11
INSYN2B	0.0674681	0.329701	2.28888	6.33e-09	2.84e-08
CTLA4	1.6457	6.05903	1.88038	4.95e-10	2.81e-09
SUV39H1	4.54029	12.5679	1.46888	2.74e-15	6.67e-14
CNTRL	3.60078	7.64634	1.08646	1.43e-09	7.4e-09
TIA1	13.4143	29.2725	1.12578	1.02e-10	6.83e-10
HMBS	5.40425	13.6376	1.33542	1.36e-14	2.55e-13
FRMD8	17.0833	39.927	1.22478	1.47e-12	1.54e-11
CXCL1	17.2635	175.821	3.34831	6.41e-13	7.44e-12
MCM4	12.0997	52.8036	2.12567	1.36e-16	6.29e-15
MAPK10	3.89809	1.54999	-1.33051	2.66e-05	5.73e-05
IP6K3	1.08152	0.425917	-1.34441	6.97e-07	2.04e-06
LCLAT1	4.82637	11.4848	1.25072	1.69e-12	1.73e-11
RTEL1	0.439538	0.966091	1.13617	2.23e-10	1.37e-09
SAMD3	0.227565	0.73239	1.68634	4.92e-07	1.49e-06
ATAD5	1.36923	6.16989	2.17188	1.44e-17	1.43e-15
KCNN4	12.6603	32.8056	1.37363	2.57e-06	6.76e-06
MIS18BP1	5.31821	13.9589	1.39217	1.76e-15	4.61e-14
KIF15	1.4754	8.73319	2.5654	6.31e-17	3.57e-15
EME1	0.555209	4.13353	2.89627	1.42e-18	4.36e-16
RBM39	25.9281	52.7386	1.02434	1e-12	1.1e-11
ANLN	5.27002	34.5631	2.71335	8.74e-18	1.09e-15
SNORA30	0.0907937	0.538716	2.56886	9.73e-06	2.28e-05
NELFCD	15.9144	48.8023	1.61662	5.2e-18	8.36e-16
IVNS1ABP	19.3007	57.4584	1.57387	5.74e-16	1.87e-14
IKBKE	8.02868	18.5138	1.20537	1.04e-09	5.52e-09
CORIN	0.150453	1.10608	2.87807	1.14e-13	1.63e-12
WDHD1	1.70237	7.46119	2.13186	1.68e-17	1.57e-15
ZGLP1	0.244978	0.622933	1.34643	3.99e-11	2.91e-10
TPR	16.6417	34.6963	1.05998	1.37e-10	8.86e-10
MAPK12	0.931274	2.24289	1.26808	5e-07	1.51e-06
PRKAR2B	22.4951	9.73128	-1.20891	6.4e-06	1.55e-05
ADAM17	5.56184	12.5933	1.17902	4.6e-12	4.25e-11
TAF1D	7.94518	22.8454	1.52375	4.85e-16	1.65e-14
JAM2	20.5494	7.57577	-1.43963	1.53e-06	4.2e-06
AGTPBP1	5.34799	11.0559	1.04775	2.76e-10	1.66e-09
CENPL	1.6944	6.50505	1.94078	3.37e-19	2.59e-16
PLCB2	2.84611	6.30404	1.14729	4.5e-07	1.38e-06
PDE2A	9.20688	3.72258	-1.30641	1.75e-05	3.89e-05
CPSF1	30.3184	65.9975	1.12222	2.85e-12	2.77e-11
ASNS	10.2366	23.1115	1.17487	7.45e-08	2.68e-07
ENTR1	12.2485	30.7801	1.32939	5.03e-17	3.05e-15
UTP20	3.95686	11.3123	1.51546	8.51e-15	1.71e-13
MLEC	48.0472	146.79	1.61123	5.96e-16	1.92e-14
BRSK2	0.897924	2.40559	1.42173	0.00317466	0.00470305
ZBTB33	9.26381	23.739	1.35758	3.75e-15	8.67e-14
HMGA2	0.14243	4.38953	4.94574	1.1e-14	2.12e-13
ATP6V0D2	0.325863	1.74771	2.42313	1.96e-10	1.22e-09
EXOSC2	7.26162	16.5204	1.18588	5.8e-15	1.23e-13
TMEM60	17.8274	38.2397	1.10097	1.02e-16	5.07e-15
OGT	18.0153	44.5457	1.30606	1.63e-11	1.31e-10
SGO1	1.35285	8.63577	2.67433	5.27e-18	8.37e-16
CLCN7	10.7481	22.5464	1.06881	4.04e-11	2.94e-10
CAND2	6.52419	2.80451	-1.21805	0.0101278	0.013761
S100A6	1032.39	2344.86	1.18352	1.67e-08	6.85e-08
G3BP1	19.4179	43.4754	1.16281	1.11e-16	5.47e-15
PDGFB	8.21289	21.0358	1.35689	1.34e-10	8.7e-10
GRAMD1A	19.1472	40.2795	1.07291	7.64e-09	3.37e-08
ATP6V1C1	13.5822	35.8311	1.39949	5.52e-17	3.26e-15
SRSF10	11.2686	27.6633	1.29566	5.57e-18	8.73e-16
E2F8	4.34049	14.2307	1.71308	1.67e-11	1.34e-10
CXCL8	9.60438	139.588	3.86134	2.73e-12	2.67e-11
HAND2	59.1012	12.9541	-2.18978	0.00598973	0.00845133
DOCK10	2.34271	4.97869	1.08759	0.000138206	0.000260438
NOP58	27.3539	82.7559	1.59711	3.62e-19	2.59e-16
PROX2	0.152268	0.348791	1.19575	3.71e-06	9.44e-06
POLA2	6.1689	14.8515	1.26753	3.22e-14	5.3e-13
CHUK	6.65764	13.7046	1.04157	9.79e-13	1.08e-11
FLT1	5.91365	12.0108	1.02221	9.74e-08	3.42e-07
GBP4	13.4879	60.887	2.17447	2.44e-07	7.88e-07
STAT1	45.0863	180.477	2.00105	6.53e-16	2.07e-14
CARD9	0.769942	2.06863	1.42585	1.1e-08	4.68e-08
FOSB	208.801	39.4792	-2.40297	0.0018809	0.00290456
CEP95	3.81307	8.15227	1.09625	1.61e-11	1.3e-10
RAD51	2.33823	11.1259	2.25044	9.23e-18	1.1e-15
GPR132	2.26216	4.78932	1.08212	4.38e-06	1.1e-05
SCN2B	0.922538	0.387195	-1.25255	1.21e-05	2.77e-05
TGDS	7.88605	19.937	1.33807	7.11e-17	3.92e-15
G2E3	3.21065	7.63809	1.25034	3e-14	4.97e-13
TMEM62	6.82761	18.8289	1.46349	5.31e-16	1.76e-14
PLK1	8.12033	40.1995	2.30757	6.2e-16	1.98e-14
SEMA7A	5.31845	11.7682	1.14581	1.31e-05	3.01e-05
MPHOSPH9	2.32997	6.05979	1.37896	2.19e-14	3.81e-13
PA2G4	51.681	115.734	1.16311	1.25e-14	2.37e-13
SNAPC4	5.53868	13.6031	1.29632	4.46e-14	7.05e-13
MDM2	7.69961	23.6305	1.61779	1.05e-12	1.14e-11
GRAMD2A	0.520582	1.82687	1.81118	3.97e-06	1e-05
AMMECR1	5.52742	12.6844	1.19838	1.12e-11	9.38e-11
SNRPB2	31.772	75.3129	1.24514	5.11e-16	1.72e-14
PRKX	6.43943	15.7625	1.29149	3.23e-11	2.41e-10
GANAB	125.975	256.048	1.02327	5.99e-13	7e-12
TNNI2	1.01113	4.05489	2.0037	5.52e-06	1.36e-05
COG3	10.5681	21.4033	1.01811	3.77e-12	3.56e-11
CXCR2	9.7815	3.02295	-1.6941	0.00737416	0.0102446
MEGF6	4.42333	10.4503	1.24034	5.77e-06	1.42e-05
ZFP64	6.09215	13.7399	1.17335	5.87e-15	1.25e-13
GGH	7.76957	44.8037	2.52771	2.76e-13	3.53e-12
ANKRD33	0.0132446	0.270225	4.35069	8.38e-07	2.42e-06
ATP6V1B1	0.575306	2.14295	1.89719	1.41e-07	4.78e-07
TUBGCP4	3.25628	6.58608	1.0162	3.37e-12	3.22e-11
RELB	16.2185	34.6546	1.0954	4.98e-11	3.55e-10
CSTF3	7.71005	18.0904	1.23041	1.97e-17	1.69e-15
HELLS	1.505	9.6918	2.687	7.13e-19	3.27e-16
SLC1A5	36.7357	138.821	1.91797	2.72e-14	4.58e-13
MX1	19.1767	41.5059	1.11396	0.000396983	0.000690705
GTF3C4	7.84393	17.0567	1.12069	2.5e-10	1.52e-09
RACGAP1	10.7389	35.3396	1.71844	4.47e-15	9.99e-14
NLRC5	5.27648	19.276	1.86916	3.86e-13	4.73e-12
KCNH4	0.232363	0.733914	1.65923	1.02e-08	4.37e-08
NIT2	5.28078	10.9623	1.05373	1.51e-16	6.75e-15
PIF1	1.23498	4.35971	1.81975	6.33e-15	1.33e-13
TANC2	1.99595	4.25294	1.09138	2e-05	4.4e-05
KIF4A	2.5952	17.0414	2.71513	2.95e-17	2.16e-15
PLBD2	28.9309	64.4644	1.15589	7.11e-13	8.11e-12
SRSF6	42.4046	90.3887	1.09192	4.75e-15	1.05e-13
ENTPD3	9.14212	4.26253	-1.10082	3.94e-07	1.22e-06
CCL3	1.61386	9.68517	2.58527	3.98e-12	3.73e-11
FAM76B	3.88732	8.42524	1.11594	3.52e-13	4.37e-12
HNRNPU	62.1228	127.762	1.04026	1.97e-13	2.62e-12
ABHD2	45.5065	116.136	1.35168	1.23e-07	4.23e-07
ITGB2	12.5639	32.896	1.38863	9.16e-06	2.16e-05
AR	2.6205	1.02447	-1.35497	0.00105898	0.00170999
NEMP2	1.79307	4.03324	1.16951	3.52e-13	4.37e-12
MRPS35	49.7303	126.855	1.35099	1.13e-14	2.17e-13
NRGN	7.27118	14.6611	1.01173	3.13e-07	9.88e-07
ZBTB41	3.9938	10.0156	1.32642	4.35e-12	4.05e-11
TRAP1	19.1311	41.3015	1.11027	6.15e-11	4.3e-10
BAZ1A	13.3492	32.358	1.27737	7.71e-16	2.38e-14
TMEM87B	20.0548	45.9831	1.19716	2.3e-14	3.97e-13
SRSF2	51.3638	115.999	1.17529	1.06e-16	5.23e-15
WFIKKN2	0.381454	0.133792	-1.51151	0.000226404	0.000411081
CEBPZ	18.7298	37.5568	1.00374	2.82e-12	2.75e-11
NDC1	8.49791	34.2562	2.01119	6.38e-18	9.34e-16
DEPDC1	1.92681	10.142	2.39606	4.64e-15	1.03e-13
ALYREF	42.6445	91.1028	1.09513	1.72e-12	1.76e-11
TUBB1	0.172673	0.474614	1.45871	1.26e-07	4.33e-07
UHRF1	2.38551	15.3292	2.68392	7.32e-18	9.88e-16
HRK	0.0941874	0.271961	1.52979	0.00961276	0.013111
KIF12	5.86069	21.3	1.86171	3.04e-09	1.46e-08
LSR	123.413	342.45	1.4724	1.22e-11	1.01e-10
FNDC5	6.36186	1.86624	-1.76932	3.54e-07	1.11e-06
PHGR1	1101.63	236.978	-2.21682	0.0296041	0.0371912
ATAD2	4.55811	28.3448	2.63657	8.68e-19	3.42e-16
ATP6V1E2	1.35184	2.8563	1.07923	8.32e-12	7.24e-11
STT3B	48.9488	105.538	1.10842	9.24e-14	1.35e-12
MCTP2	2.21924	5.94933	1.42266	7.04e-11	4.85e-10
CKAP2L	1.69888	9.12605	2.42541	1.96e-16	8.14e-15
CHTF18	2.34547	10.009	2.09336	1.13e-16	5.5e-15
MET	10.2208	77.9644	2.93131	4.77e-17	2.94e-15
WDR62	0.916724	5.9184	2.69065	3.2e-17	2.24e-15
LILRB4	1.90438	8.8401	2.21474	3.16e-11	2.37e-10
CD4	18.1459	36.4274	1.00538	5.38e-05	0.000109306
CDK16	26.5151	55.8705	1.07527	1.67e-13	2.27e-12
SRC	36.95	78.8138	1.09288	6.28e-10	3.48e-09
ATP1B1	258.804	519.066	1.00406	3.02e-06	7.83e-06
RBM15	5.66098	12.858	1.18355	1.98e-14	3.51e-13
NFKB2	28.3663	60.6312	1.09588	1.3e-10	8.46e-10
XRN2	39.0445	101.161	1.37346	2.65e-17	2.02e-15
RTN4R	2.65268	9.4515	1.83309	6.26e-12	5.61e-11
ESCO2	1.64256	6.29316	1.93784	1.97e-13	2.62e-12
